# Supplementary material for: Targeted Exon Sequencing Successfully Discovers Rare Causative Genes and Clarifies the Molecular Epidemiology of Japanese Deafness Patients
Source: PLOS journal article supplement (doi:10.1371/journal.pone.0071381), 2013-08-13
Supplement: S5 (10.1371/journal.pone.0071381.s005) [file journal.pone.0071381.s005]

Supplementary Table S3. Comparison between the current algorithm and VipR

| gene           | mutation      | mutations<br>detected by<br>Sanger<br>sequencing | mutations<br>detected by<br>current MPS<br>algorithm | mutations<br>detected by<br>VipR |
|----------------|---------------|--------------------------------------------------|------------------------------------------------------|----------------------------------|
| <i>GJB2</i>    | G45E; Y136X   | 10                                               | 10                                                   | 10                               |
|                | V37I          | 6                                                | 6                                                    | 6                                |
|                | T8M           | 1                                                | 1                                                    | 1                                |
|                | T86R          | 1                                                | 1                                                    | 1                                |
|                | R143W         | 3                                                | 3                                                    | 0                                |
|                | 235delC       | 36                                               | 36                                                   | *                                |
|                | 35insG        | 1                                                | 1                                                    | *                                |
|                | 176_191 del16 | 3                                                | 3                                                    | *                                |
|                | 299_300delAT  | 5                                                | 5                                                    | *                                |
|                | 511insAACG    | 2                                                | 0                                                    | *                                |
| <i>SLC26A4</i> | H723R         | 13                                               | 13                                                   | 13                               |
|                | T410M         | 4                                                | 4                                                    | 4                                |
|                | 919-2A>G      | 2                                                | 2                                                    | 2                                |
|                | M147V         | 1                                                | 1                                                    | 0                                |
|                | T527P         | 1                                                | 1                                                    | 0                                |
|                | S532I         | 1                                                | 0                                                    | 0                                |
|                | R581S         | 1                                                | 0                                                    | 0                                |
|                | 2111insGCTGG  | 1                                                | 0                                                    | *                                |
|                | 1652insT      | 1                                                | 0                                                    | *                                |
| total          |               | 93                                               | 87                                                   | 37                               |

\* VipR program could not pick up deletion/insertion mutation
